# Supplementary material for: Identification of tRF-29-79MP9P9NH525 as a biomarker and tumor suppressor of gastric cancer via regulating KIF14/AKT pathway
Source: Springer Nature journal article supplement (doi:10.1038/s41420-025-02514-9), 2025-05-15
Supplement: MOESM1 [file 41420_2025_2514_MOESM1_ESM.pdf]

## Supplemental data

**Supplemental Table 1. The sequences of primers, mimics and inhibitors**

| Name                          | Sequence (5'→3')                                                                                                                                       |
|-------------------------------|--------------------------------------------------------------------------------------------------------------------------------------------------------|
| U6 snRNA                      | RT-primer:<br>GCAGACGAGGGTACCTCCTCTCTTCTCTACTCGT<br>GTCCTACCCTCGTCTGCAAAATA<br>Forward: GGCAGCACATATACTAAAATTGGAA<br>Reverse: CGAATTTGCGTGTTCATCCTTGCG |
| tRF-29-79MP9P9NH525           | RT-primer:<br>GCAGAGACGGGGTACCTCCTCTCTTCTCTACTC<br>GTGTCCTACCCCGTCTCTGCGAACGT<br>Forward: GGTACCTCCTCTCTTCTCTACT<br>Reverse: GGTGTTTCCGTAGTGTAGTGGT    |
| NC mimics                     | UUGUACUACACAAAAGUACUG                                                                                                                                  |
| NC inhibitor                  | CAGUACUUUUGUGUAGUACAA                                                                                                                                  |
| tRF-29-79MP9P9NH525 mimics    | GUUUCCGUAGUGUAGUGGUUAUCACGUUC                                                                                                                          |
| tRF-29-79MP9P9NH525 inhibitor | GAACGUGAUAAACCACUACACUACGGAAAC                                                                                                                         |
| KIF14-F                       | GTGGAAGGGGAAGAACACGA                                                                                                                                   |
| KIF14-R                       | CAGCGGGACTAATCGTAGCA                                                                                                                                   |
| AQP11-F                       | GCTGACGCTCGTCTACTTCT                                                                                                                                   |
| AQP11-R                       | TGAGCAAGTCGACTCGGATG                                                                                                                                   |
| S1PR3-F                       | GATCCTCTACGCACGCATCT                                                                                                                                   |
| S1PR3-R                       | CACAGCCAACACGATGAACC                                                                                                                                   |
| THBS1-F                       | GCAAAGAAGTGCCTGATGCC                                                                                                                                   |
| THBS1-R                       | CGTTCTTGTTGCAGTCGTGG                                                                                                                                   |
| GAPDH-F                       | AAGGTGAAGGTCGGAGTCAA                                                                                                                                   |
| GAPDH-R                       | AATGAAGGGGTCATTGATGG                                                                                                                                   |
| si-NC (Sense)                 | UUCUCCGAACGUGUCACGUTT                                                                                                                                  |
| si-NC (Antisense)             | ACGUGACACGUUCGGAGAATT                                                                                                                                  |
| si-KIF14 -1 (Sense)           | GCUGCAUUUGAAGUCGGAUUAU                                                                                                                                 |
| si-KIF14 -1 (Antisense)       | AUAUCCGACUUCAAAUGCAGC                                                                                                                                  |
| si-KIF14 -2 (Sense)           | CGGCAAGAAAUAACAUCUUUA                                                                                                                                  |
| si-KIF14 -2 (Antisense)       | UAAGGAUGUUUUUCUUGCCG                                                                                                                                   |
| si-KIF14 -3 (Sense)           | GCUGCAUUUGAAGUCGGAUUAU                                                                                                                                 |
| si-KIF14 -3 (Antisense)       | AUAUCCGACUUCAAAUGCAGC                                                                                                                                  |

## A

C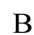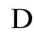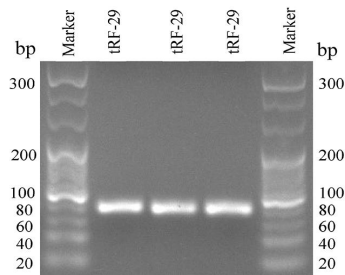

tRF-29 is a type of 5'-tRF that derived from tRNA-Val-AAC. (B) The sequences of primers for reverse reaction and amplification, and the process of qRT-PCR. (C) The T-A cloning sequencing result of tRF-29 qRT-PCR product. (D) Agarose gel electrophoresis results tRF-29 qRT-PCR products of three tissue samples.

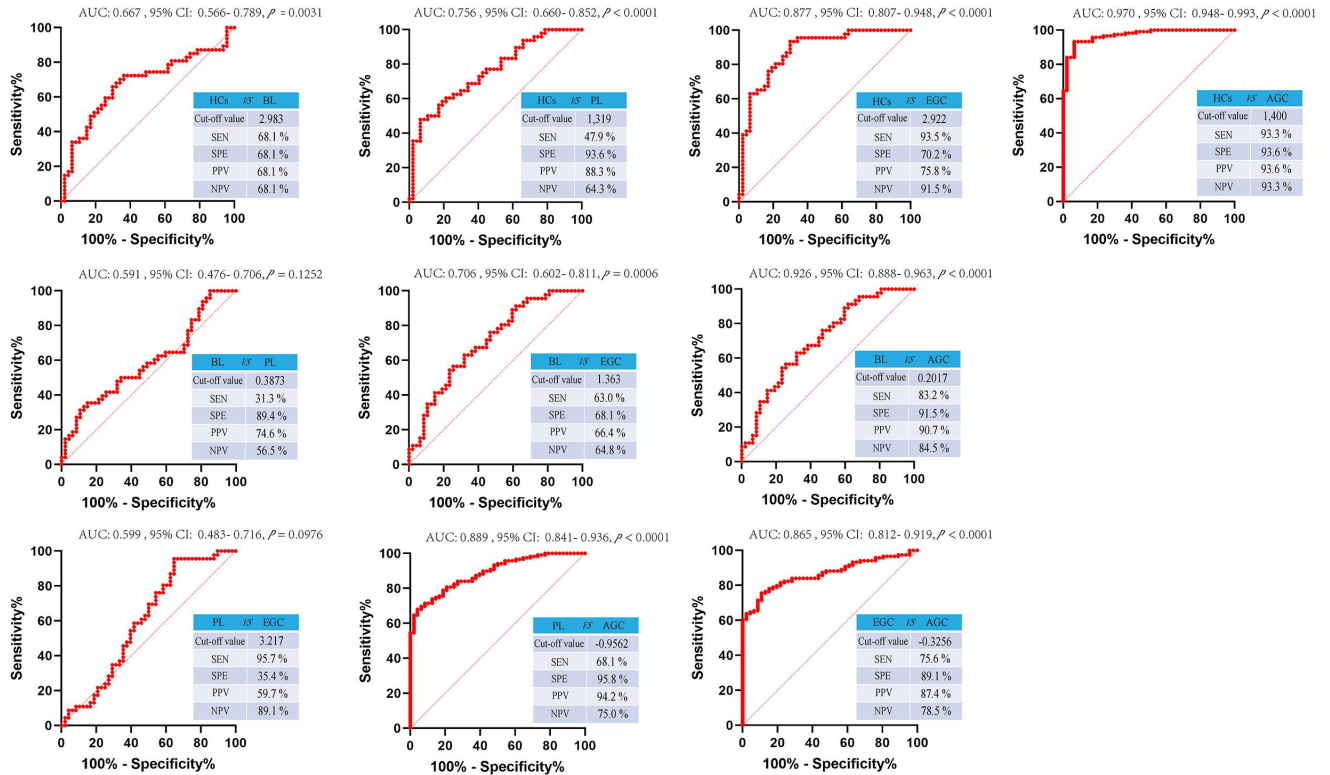

**Supplemental Figure 2. The value of tRF-29-79MP9P9NH525 (tRF-29) in monitoring different gastric mucosa.** tRF-29 shows discriminating efficiency in different gastric mucosa. HCs, healthy controls ( $n=47$ ); BL, benign lesion ( $n=47$ ); PL, precancerous lesion ( $n=48$ ); EGC, early gastric cancer ( $n=46$ ); AGC, advanced gastric cancer ( $n=119$ ); SEN, sensitivity; SPE, specificity; PPV, positive predictive value; NPV, negative predictive value.

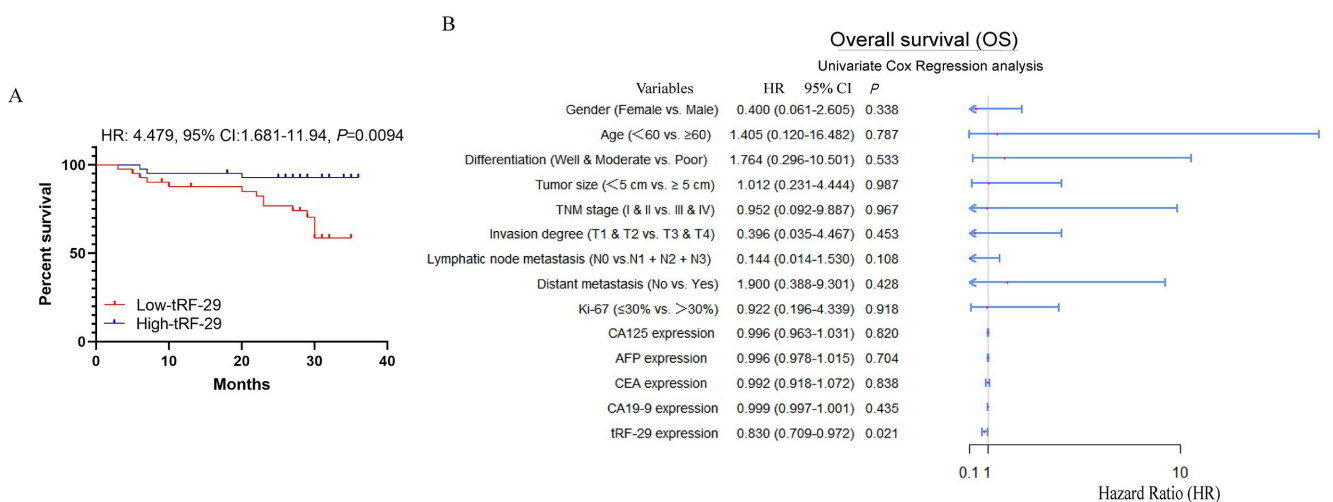

**Supplemental Figure 3. The prognostic value of tRF-29-79MP9P9NH525 (tRF-29) in gastric cancer (GC).** (A) Low level of tRF-29 was related with poor overall survival ( $n=84$ ). (B) Multivariate Cox analysis validated the predictive value of tRF-29 in GC.

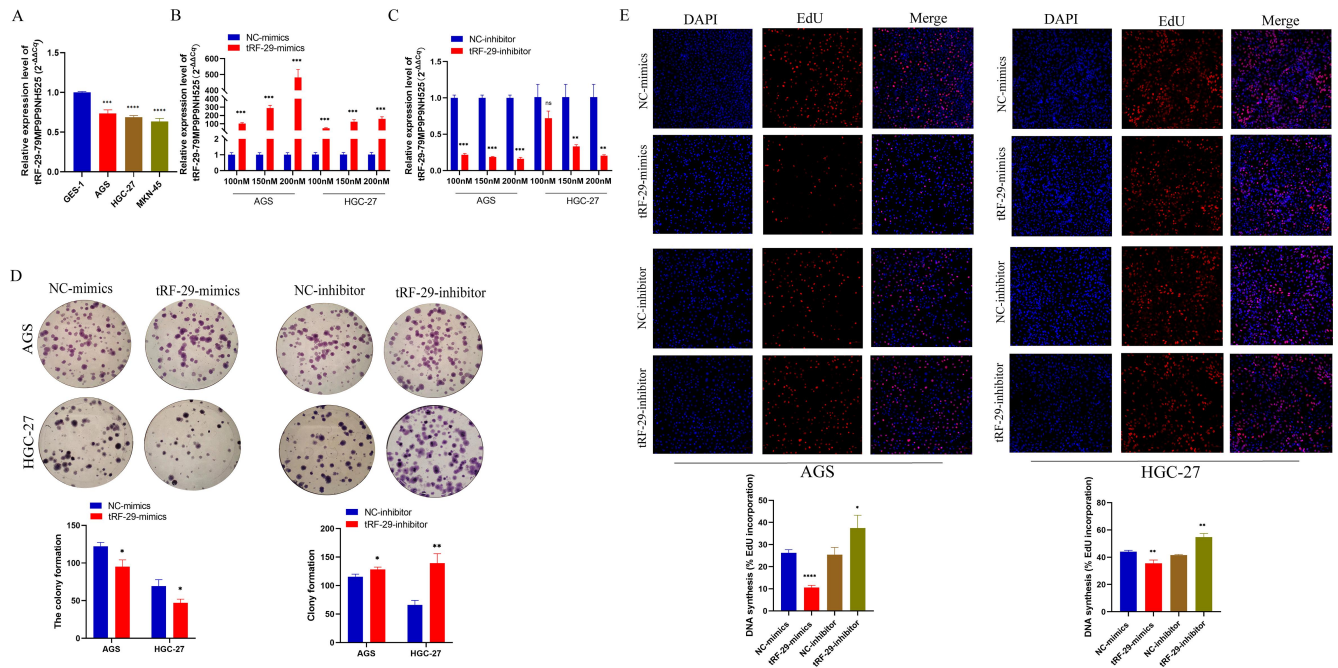

**Supplemental Figure 4. The effects of tRF-29-79MP9P9NH525 (tRF-29) on the proliferation of gastric cancer.** (A) tRF-29 is downregulated in AGS, HGC-27, and MKN-45 cells compared with GES-1 cells. (B, C) The transfection efficiency of tRF-29-mimics (B) and tRF-29-inhibitor (C) was quantified by qRT-PCR. (D) The effects of tRF-29 on the growth of gastric cancer cells. (E) The effects of tRF-29 on the proliferative activity were determined by EdU assay.  $n=3$ ;  $*P<0.05$ ,  $**P<0.01$ ,  $****P<0.0001$ .



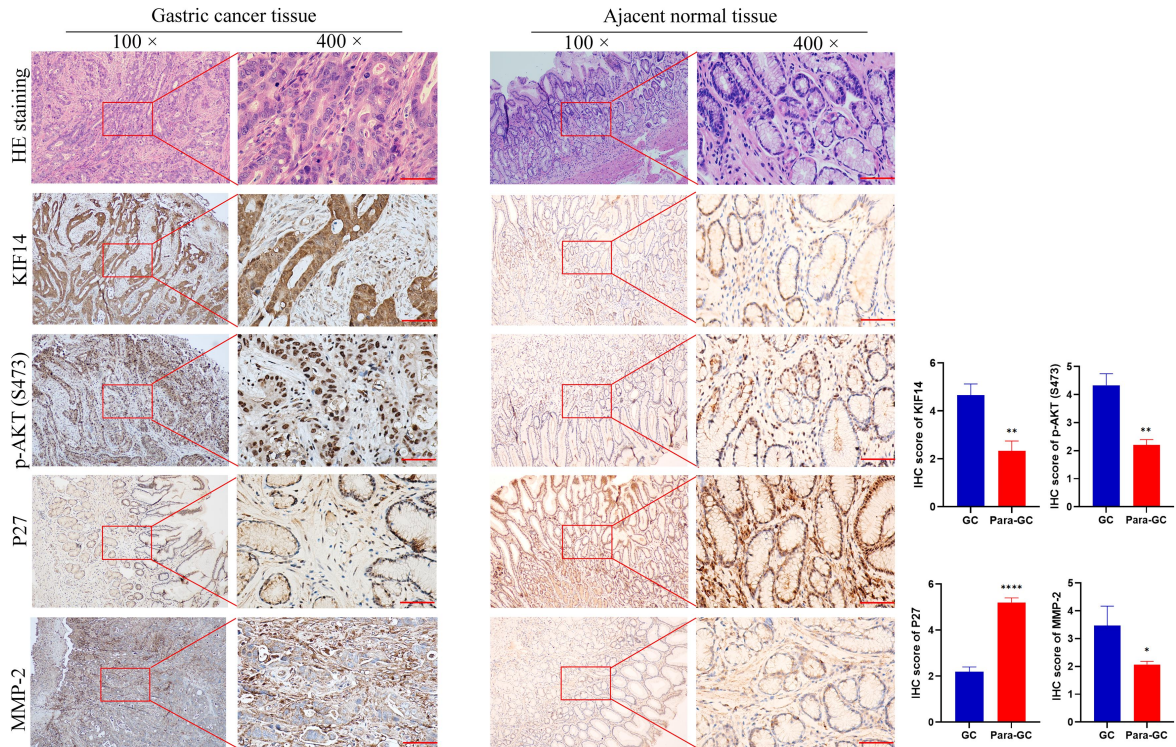

**Supplemental Figure 5. Differential tRF-29 level shows various effects on KIF14/AKT pathway in human tissue samples.** Immunohistochemistry (IHC) staining of the protein levels of KIF14, P27, MMP-2, and p-AKT(S473) in human tissue samples.  $n=3$ ; \* $P<0.05$ , \*\* $P<0.01$ , \*\*\*\* $P<0.0001$ .

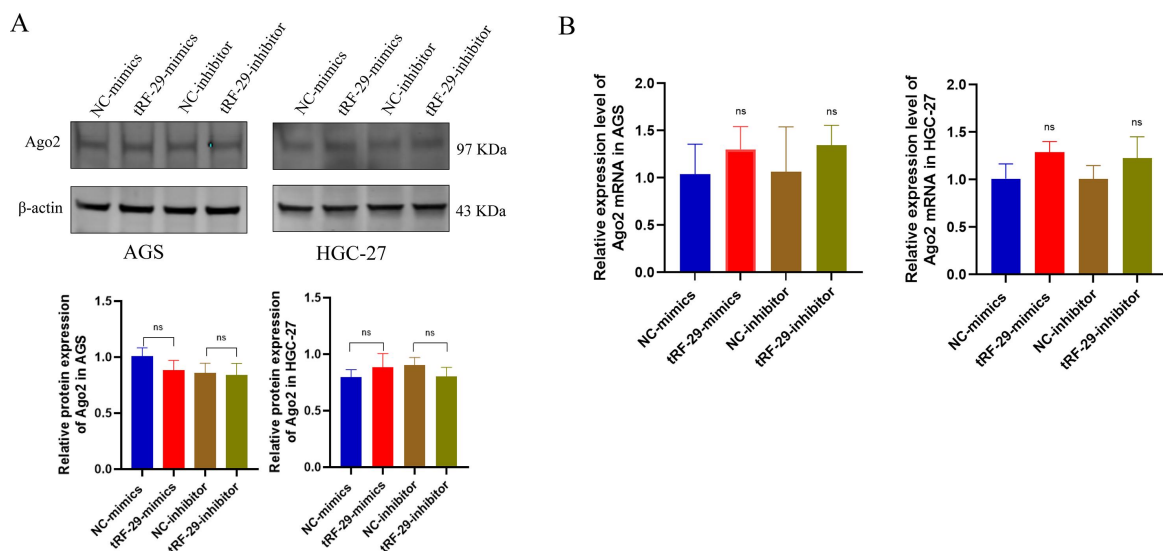

**Supplemental Figure 6. tRF-29 shows no effects on Ago2 expression.** (A) Ago2 protein level was determined by WB in GC cells with tRF-29 upregulation or downregulation. (B) Ago2 mRNA level was determined by qRT-PCR.  $n=3$ ; ns, no significance.

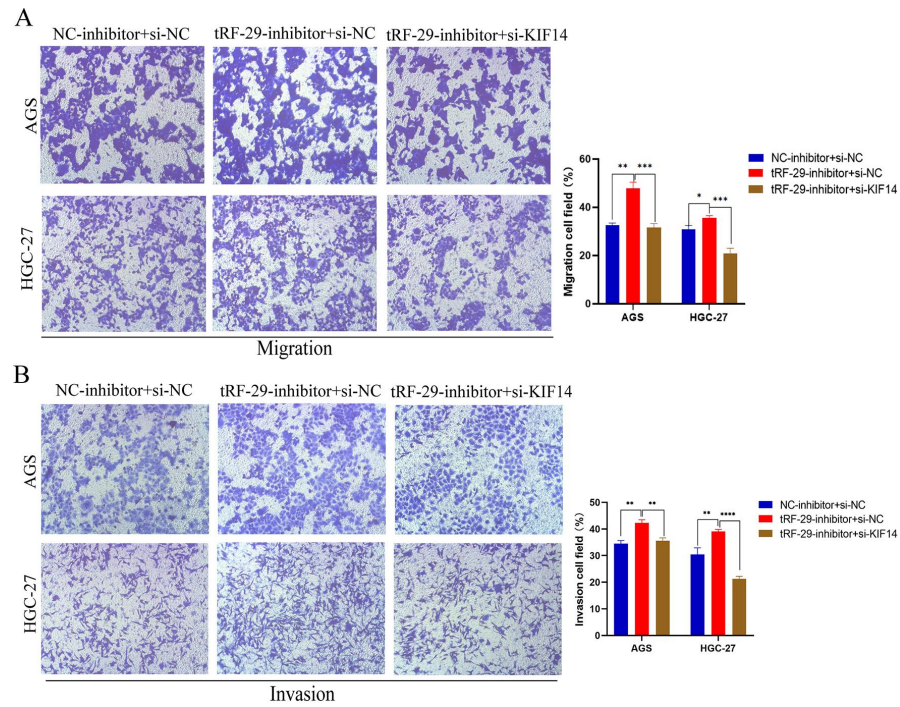

**Supplemental Figure 7. siRNA of KIF14 counteracts tRF-29's impact on gastric cancer cell metastasis.** Downregulation of KIF14 reverses tRF-29's effects on gastric cancer cells' migration (A) and invasion (B).  $n=3$ ;  $*P<0.05$ ,  $**P<0.01$ ,  $****P<0.0001$ .
